# Supplementary material
Source: Springer Nature journal article supplement (https://www.springermedizin.de/resource/supplementary/12967_2013_1881_MOESM4_ESM.pdf/9575000)

**A)**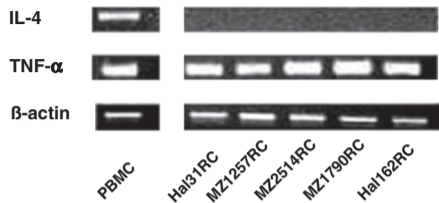**B)**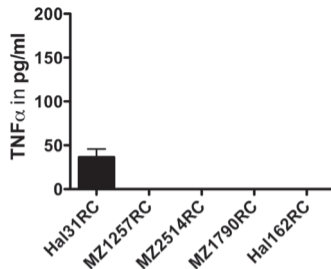**C)**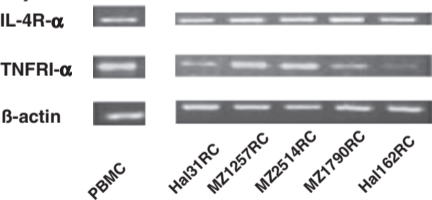**D)**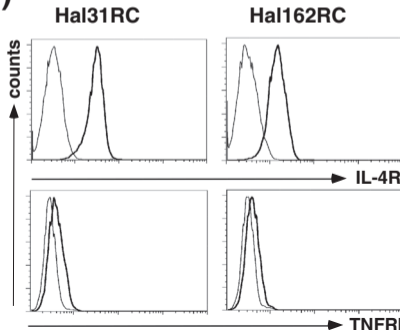

Supplement: MOESM4 [file 9575000]
